# Supplementary material for: Fabrication of a micropatterned shape-memory polymer patch with l-DOPA for tendon regeneration
Source: Royal Society of Chemistry journal article supplement (doi:10.1039/d4bm00298a), 2025-01-01
Supplement: d4bm00298a7.pdf [file d4bm00298a7.pdf]

## Supporting Information

### Contents

**Figure S1.** Degradation test of (a) SMP-CEC444 and (b) mechanical properties in tensile strength test of SMP-CEC444.

**Figure S2.** Shape-memory effect test videos. (a) *In vitro* simulation using a glass rod and (b) *ex vivo* simulation using the rat's hind limb.

**Figure S3.** Tensile stress vs. tensile strain curve in each group with 10 loading rates tested at room temperature.

**Figure S4.** Cell morphological quantitative analysis: distribution of orientation.

**Figure S5.** Tensile stress vs. tensile strain curve in each group with 10 loading rates tested at room temperature. Biomechanical test of Achilles tendons retrieved after 8 weeks

**Figure S6.** Quantification results of histological scoring. (\* $P < 0.05$ , \*\* $P < 0.01$  compared to N.CTL; # $P < 0.05$  compared to K.CTL; and  $^{\$}P < 0.05$  compared to SMP-F). NS: no significant difference.

**Table S1.** The residual mass of pure PCL and SMP-CEC444 showed a decrease at each time point.

**Table S2.** Histological scoring of Achilles tendons.

(a)

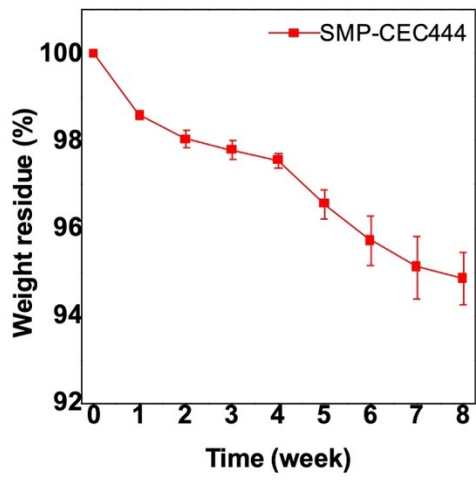

(b)

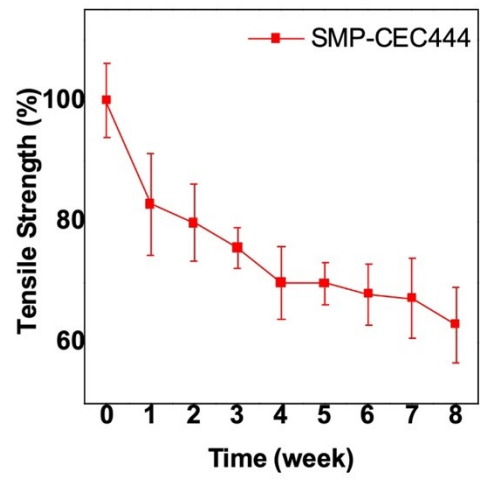

**Figure S1.** Degradation test of (a) SMP-CEC444 and (b) mechanical properties in tensile strength test of SMP-CEC444.

(a)

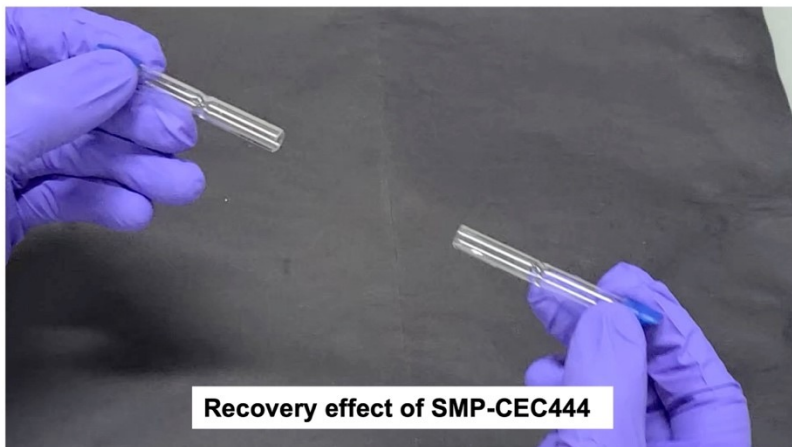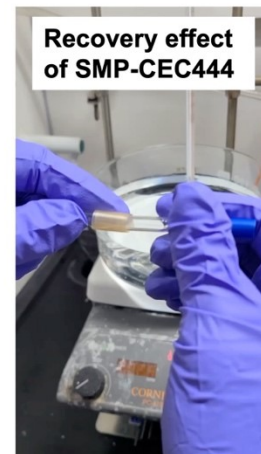

(b)

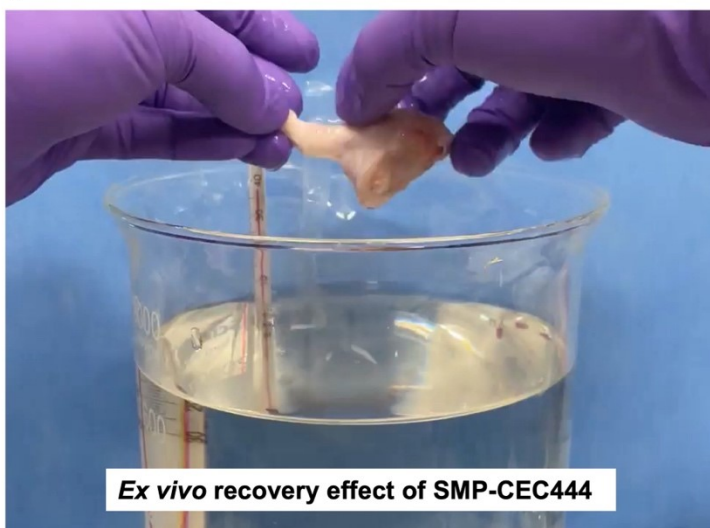

**Figure S2.** Shape-memory effect test videos. (a) *In vitro* simulation using a glass rod and (b) *ex vivo* simulation using the rat's hind limb.

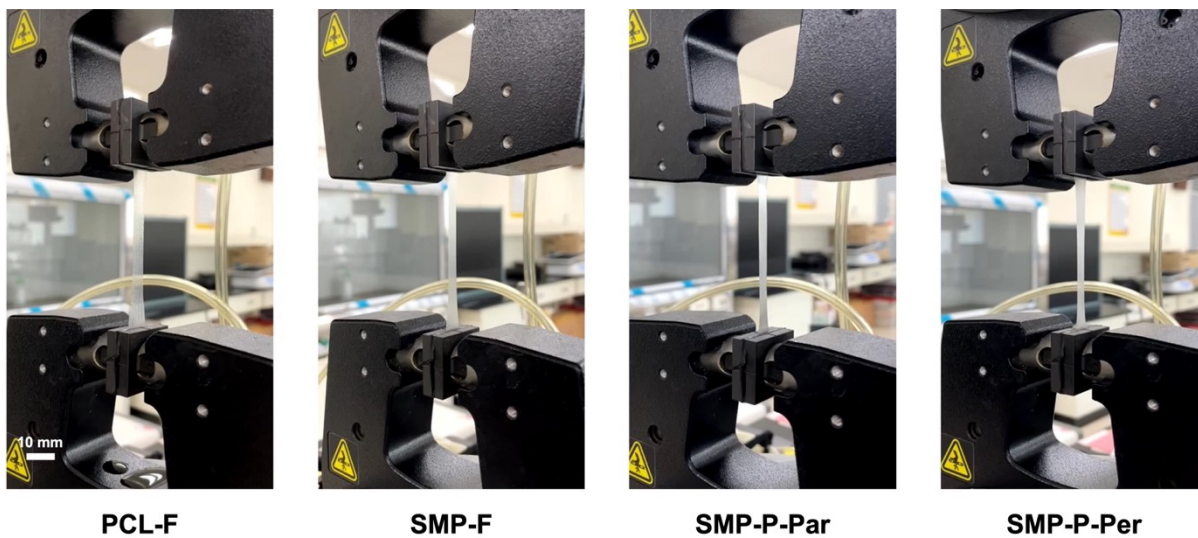

**Figure S3.** Tensile stress vs. tensile strain curve in each group with 10 loading rates tested at room temperature.

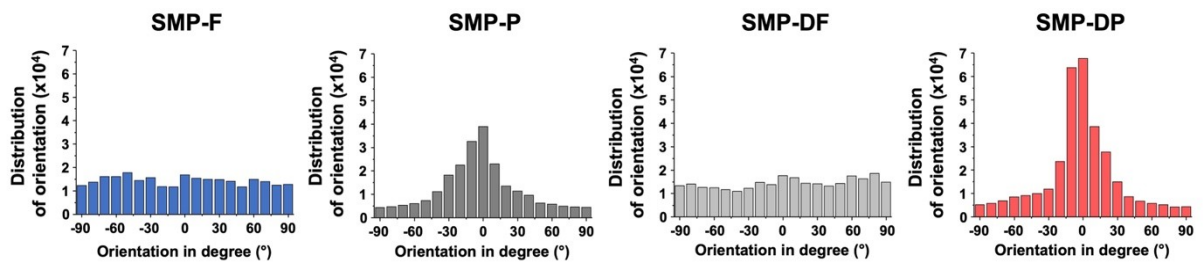

Figure S4. Cell morphological quantitative analysis: distribution of orientation.

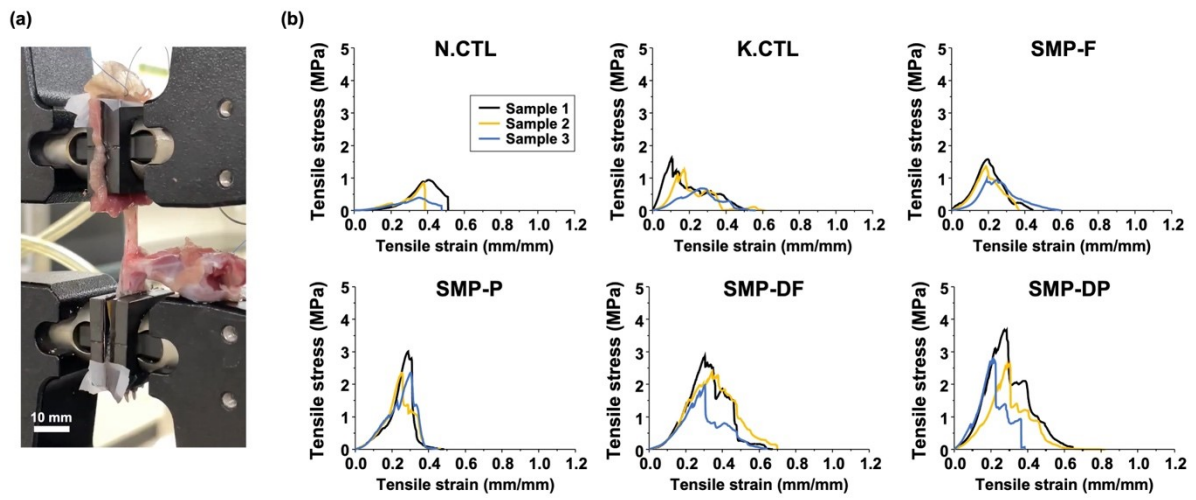

**Figure S5.** (a) Supplementary video file for biomechanical test. (b) Tensile stress vs. tensile strain curve in each group with 10 loading rates tested at room temperature. Biomechanical test of Achilles tendons retrieved after 8 weeks.

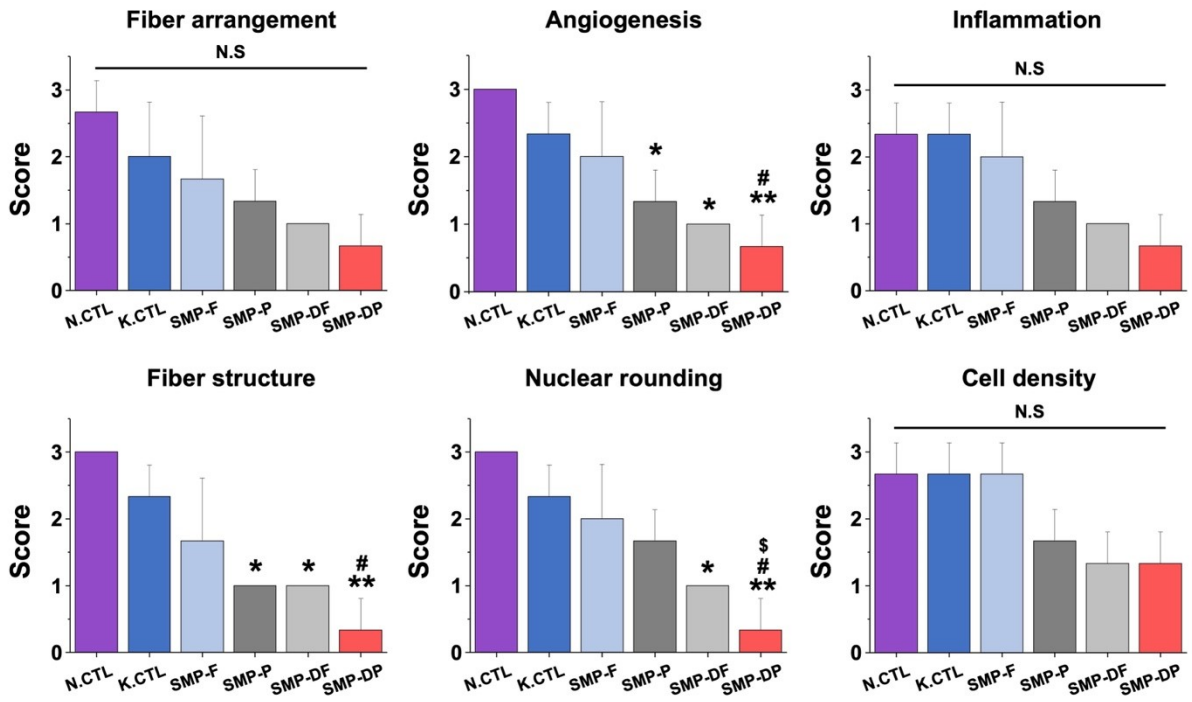

**Figure S6.** Quantification results of histological scoring. (\* $P < 0.05$ , \*\* $P < 0.01$  compared to N.CTL; # $P < 0.05$  compared to K.CTL; and  $^sP < 0.05$  compared to SMP-F). NS: no significant difference.

**Table S1.** The residual mass of pure PCL and SMP-CEC444 showed a decrease at each time point.

|                | <b>Tensile Strength (%)</b> | <b>Tensile Strength STDEV (%)</b> | <b>Weight residue (%)</b> | <b>Weight residue_ STDEV (%)</b> |
|----------------|-----------------------------|-----------------------------------|---------------------------|----------------------------------|
| <b>0 week</b>  | 100                         | 6.12                              | 100                       | 0                                |
| <b>1 week</b>  | 82.86                       | 8.36                              | 99.30                     | 0.02                             |
| <b>2 weeks</b> | 79.77                       | 6.34                              | 98.86                     | 0.20                             |
| <b>3 weeks</b> | 75.62                       | 3.41                              | 98.27                     | 0.23                             |
| <b>4 weeks</b> | 69.90                       | 5.92                              | 97.71                     | 0.17                             |
| <b>5 weeks</b> | 69.80                       | 3.45                              | 96.56                     | 0.33                             |
| <b>6 weeks</b> | 68.02                       | 5.05                              | 95.72                     | 0.58                             |
| <b>7 weeks</b> | 67.33                       | 6.54                              | 95.12                     | 0.72                             |
| <b>8 weeks</b> | 62.96                       | 6.16                              | 94.85                     | 0.60                             |



**Table S2.** Histological scoring of Achilles tendons.

| Histological scoring analysis                            |                             |                         |                                                |                         |
|----------------------------------------------------------|-----------------------------|-------------------------|------------------------------------------------|-------------------------|
|                                                          | Grade 0<br>(Native control) | Grade 1                 | Grade 2                                        | Grade 3                 |
| Fiber arrangement                                        | Compacted and parallel      | Slightly loose and wavy | Moderately loose, wavy and cross to each other | No identifiable pattern |
| Fiber structure                                          | Continue, long fiber        | Slightly fragmented     | Moderately fragmented                          | Severely fragmented     |
| Angiogenesis<br>(area infiltrated by neo-vascular)       | < 10%                       | 10 ~ 20%                | 20 ~ 30%                                       | > 30%                   |
| Nuclear rounding                                         | Long spindle shape cells    | Slightly rounding       | Moderately rounding                            | Severely rounding       |
| Inflammation<br>(area infiltrated by inflammation cells) | < 10%                       | 10 ~ 20%                | 20 ~ 30%                                       | > 30%                   |
| Cell density                                             | Normal pattern              | Slightly increase       | Moderately increase                            | Severely increase       |
